# Supplementary material
Source: publisher figshare collection journal article supplement (https://frontiersin.figshare.com/ndownloader/files/24315743)
Supplement: Supplementary file [file 24315743]

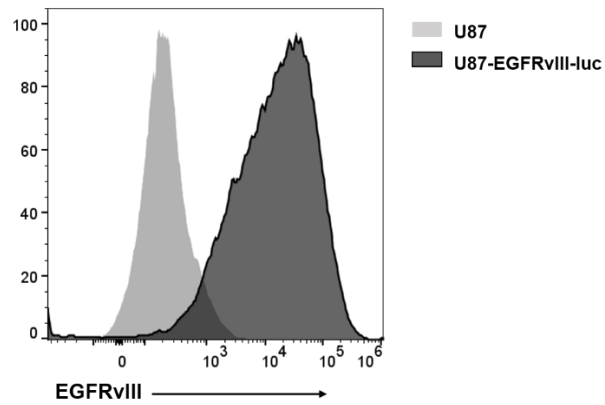

**Supplemental Fig.1. Construction of EGFRvIII-overexpressed glioma cell line.** Human glioma cell line U87 were transduced with EGFRvIII and luciferase encoding lentivirus. Histogram showing EGFRvIII overexpression in U87-EGFRvIII-luc cells.

### Targeting non-EGFRvIII U87 cells

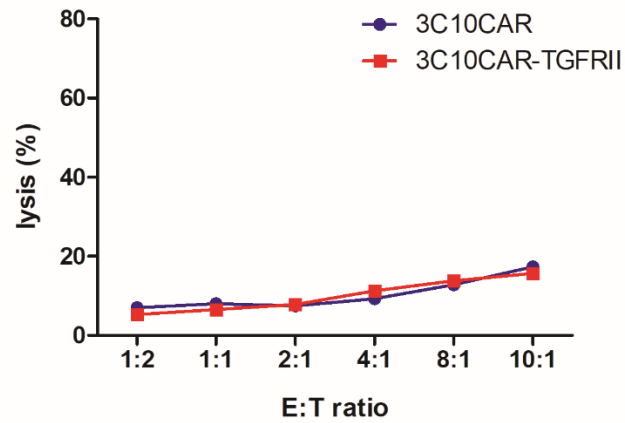

**Supplemental Fig.2. Cytolytic activity of 3C10CAR-Ts or 3C10CAR-TGFR II-Ts targeting non-EGFRvIII U87 cells.** Both 3C10CAR-Ts and 3C10CAR-TGFR II-Ts showed minimum cytolytic activity when coculturing with non-EGFRvIII U87 cells.

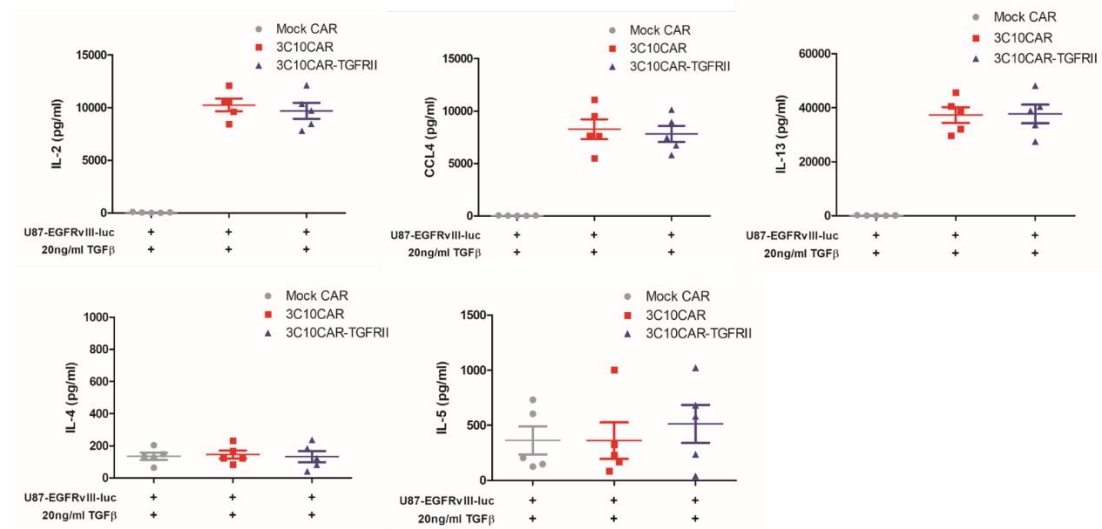

**Supplemental Fig.3. Cytokine release pattern of CAR-T cells targeting U87-EGFRvIII-luc cells and TGFβ.**

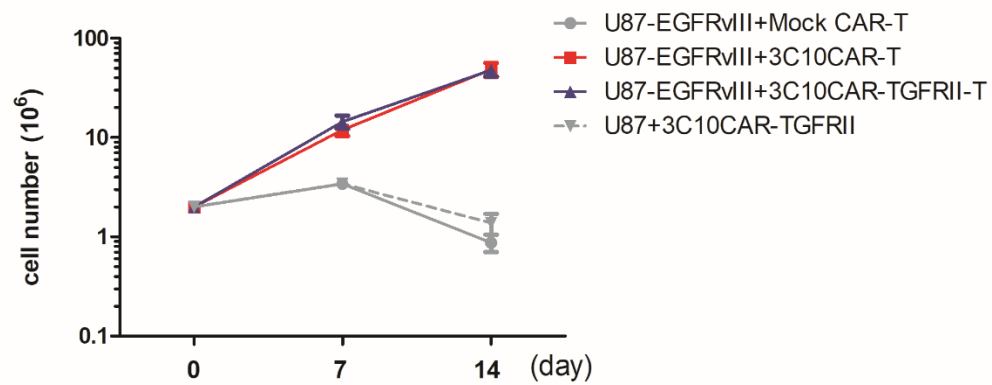

**Supplemental Fig.4. CAR-T cells proliferation when cocultured with target cells.**
